# Supplementary material for: Wearing N95 masks decreases the odor discrimination ability of healthcare workers: a self-controlled before-after study
Source: PeerJ. 2023 Mar 14;11:e14979. doi: 10.7717/peerj.14979 (PMC10022507; doi:10.7717/peerj.14979)
Supplement: Supplemental Information 1 — The data showed low olfactory scores in N95 mask wearers and surgical mask wearers, while blank control participants had normal olfactory scores. We analyzed the relationship between different olfactory scores and mask-wearing in these participants. [file peerj-11-14979-s001.xlsx]

## Sheet: Sheet1
																				The results of wearing an N95 mask															The results of wearing a surgical mask
participant	age	length of smoking	Number of daily smoking	嗅觉减退	近两周有无感冒	鼻炎	手术	1	2	3	4	5	6	7	8	9	10	11	12	correct	wrong	blank	1	2	3	4	5	6	7	8	9	10	11	12	correct	wrong	blank	1	2	3	4	5	6	7	8	9	10	11	12
answer								B	A	C	C	C	D	B	A	B	A	C	C	0	12	0	B	A	C	C	C	D	B	A	B	A	C	C	0	12	0	B	A	C	C	C	D	B	A	B	A	C	C
1	45	28	10	1	0	1	0	0	0							0	0	0		0	12	5					0	1		0	0				1	11	3			0		0			0	0
2	38	20	10	0	0	1	0				0		0		0	0	0	0		0	12	6			0		1			0	0		0	0	1	11	5								0	0	0	0
3	48	30	10	0	0	0	0	0					0		0		0			0	12	4	0							0					0	12	2	1							0
4	40	20	10	0	0	1	0										0			0	12	1										0			0	12	1
5	39	24	10	0	0	0	0												1	1	11	0													0	12	0												1
6	40	15	0	1	0	1	1		0											0	12	1								1					1	11	0					1				1
7	62	0	0	0	0	1	0	0				0	0	0	0		0	0		0	12	7	0			1	0	0	0	0	0	0	0		1	11	8	0	0	1		0				0	1
8	30	17	10	0	0	1	0				0		0		0	0	0		1	1	11	5	0		1			1			0	0			2	10	3				0
9	49	0	0	0	0	0	0	0			0		0							0	12	3	0					0							0	12	2	0
10	47	34	15	0	1	1	1	0			0	0	0	0	0	0	0	0		0	12	9	0			0				0	0	0	0		0	12	6			1					0			0
11	29	15	5	0	0	0	0	0		1			1	1	1			0		4	8	2					1	1		1				1	4	8	0					1	1					1	1
12	49	30	5	0	0	0	0					1					0			1	11	1					1	0		1	0				2	10	2					1			1
13	36	15	10	0	0	0	0		0	0		0				0	0	0		0	12	6		0		0	0	0		0	0			0	0	12	7				1				0		0	0
14	40	26	0	0	0	0	0					1	0				1	0		2	10	2	1					1				1	0		3	9	1	1				0	1		0		0	0
15	41	18	3	0	0	0	0					1								1	11	0					1						1		2	10	0					1
16	51	40	12	0	0	1	0	0						0		1				1	11	2					1			0		0			1	11	2	1							0		0
17	32	15	10	0	0	0	0	0	1				0	1	0		0	0		2	10	5		0			1	0		1		0	0		2	10	4					1			1			0	1
18	47	27	10	0	0	0	0					1						0		1	11	1					1	0		1		0	0		2	10	3					1			0		0
19	52	30	10	0	1	0	0													0	12	0								1					1	11	0					1				1
20	38	15	20	0	0	1	1				0	0	0		0	0	0	0	0	0	12	8				0				0	0	1	0	1	2	10	4								0	0	0
21	31	13	10	0	0	1	0	0	0	0	0		0		0	0	0	0		0	12	9	0				1			0			0		1	11	3	0				0			0			0	1
22	52	23	14	1	1	1	0			1	0						0	0	1	2	10	3	0	1	1							0	0	1	3	9	3		1		0	1			0			0
23	36	20	20	0	0	1	0										1		1	2	10	0								1	0	1			2	10	1					1
24	56	40	10	0	0	0	0					1								1	11	0			1		1			1					3	9	0				1	1						1
25	21	4	10	0	1	0	0						1							1	11	0						1					1		2	10	0
26	32	20	5	0	0	0	0	0	0				1					0	1	2	10	3	0				0	0		0		0	1	1	2	10	5								0				1
27	31	15	10	0	0	1	1										0	0	0	0	12	3					1	0		1		0		1	3	9	2					1			0		0	1	1
28	50	0	0	0	0	0	0	1					0		0		0	0		1	11	4	1							1		0	0		2	10	2	1					1	1		1
29	34	15	10	0	0	1	0				0			0	1		0			1	11	3									0		1		1	11	1									0	0	1
30	36	18	10	0	0	0	0	0	0			0	0		0	0	0	0	0	0	12	9						0			0	0	0	1	1	11	4					1			1				1
31	43	25	15	0	0	0	0				0		0					1	1	2	10	2				0				1				1	2	10	1				1		1		1		0		1
32	38	0	0	0	0	1	0						1		1		1	0		3	9	1						1		1					2	10	0								1			0
33	38	22	50	0	0	0	0	1	0		1	1					0			3	9	2			1	0		0		1		0	0		2	10	4			1	0	1			0		0	0
34	41	20	5	0	0	0	0					0				0	0	0		0	12	4				0	0		0	0			0		0	12	5	1	1		1		1				1
35	49	0	0	0	0	0	0	0			1	0			0	0				1	11	4				1						0		1	2	10	1				1				1		1
36	25	0	0	0	0	0	0					1	1						1	3	9	0						1						1	2	10	0						1		1			1	1
37	51	20	6	0	0	1	0				0		0		0					0	12	3						1		0					1	11	1					1	1			0
38	32	17	15	0	0	0	0								0		0	0		0	12	3								0	0	0	0		0	12	4									0	0	0
39	50	22	10	0	0	1	0	0	1					0				0		1	11	3	0	1		1			0	0		0	1		3	9	4	0						1					1
40	50	30	6	0	0	0	0					1					1			2	10	0					1					1			2	10	0					1
41	56	30	7	0	0	1	0	0					0				0			0	12	3	1					1		1					3	9	0				1
42	32	15	10	0	1	0	0					1					0			1	11	1					1			0	0				1	11	2					1			0
43	42	17	0	0	0	1	0	0	0		0	0	0	0	0	0	0	0	0	0	12	11	0			0		0		0	0	0	0	1	1	11	7		0		0	0			0	0	0	0	1
44	54	30	0	0	0	0	0			1	0	0	0			0	0	0	0	1	11	7	1							1		1		1	4	8	0			1		1							1
45	28	0	0	0	0	0	0													0	12	0								1		1			2	10	0								1
46	32	17	10	0	0	1	0	0			0	0	0		0	0	0	0	1	1	11	8	0			0	0			0	0	0	0	1	1	11	7				0	0			0	0			1
47	44	5	0	0	0	0	0						0			0	1			1	11	2				0		0		1		0			1	11	3				0				1
48	42	25	10	0	0	0	1	0		0	0	0					0	0		0	12	6		0		0	1	0	0	0	0	0	0		1	11	8			0	0				0
49	26	10	5	0	0	0	0	0					0	0	1		0			1	11	4					1	0			0	0		1	2	10	3				0		1		0	0	0
50	47	30	10	0	0	0	0	0			0		0		0		0		1	1	11	5	0			0		0	0	0	1			1	2	10	5												1
51	49	0	0	0	0	0	0				0	1		1	0				1	3	9	2								0			0	1	1	11	2				0	0			1				1
52	59	0	0	0	0	0	0	0	0	0	0	0	0		0	0	0	0		0	12	10	0	0	0	0		0		0	0	0	0	0	0	12	10	0	0		1	1		0	0	0		1
53	37	10	3	0	0	0	0					1					1			2	10	0					1					1			2	10	0					1	1				1
54	44	27	20	0	0	0	0		0		0			1	0		0		1	2	10	4						0			0	0			0	12	3				0	1	0	1			0
55	28	8	6	0	0	0	1												1	1	11	0								1				1	2	10	0								1
56	33	11	0	0	0	0	0	0		0		0		0	0		0	0	1	1	11	7	0				1		0	0			0		1	11	4	0							0
57	42	20	10	0	0	0	0	1					1							2	10	0	1					1							2	10	0	1					1
58	32	17	12	0	0	1	0						1		0		0			1	11	2								0	0	0	0		0	12	4					1			0		0
59	28	8	5	0	0	0	0				1					1		1		3	9	0				1					1		1		3	9	0												1
60	35	20	9	0	0	0	0								0	0	0		1	1	11	3	1		1	1		1		0					4	8	1								0	0			1
61	27	11	7	0	0	0	0													0	12	0					1						1		2	10	0					1						1
62	39	20	10	0	0	1	1					1					0	0		1	11	2					1			1	0	0		0	2	10	3					0			0		0
63	29	10	5	0	0	1	0	0			0	1								1	11	2	0			0	1			0		0	0		1	11	5	1			0	1	1		0		0
64	29	12	5	0	0	1	0										1			1	11	0				0		1		0					1	11	2					1	1		1
65	38	20	12	0	0	0	0	0							0	0	0	0	1	1	11	5								0		0			0	12	2						1		0	0	0
66	29	0	0	0	0	0	0								0	0	0	0		0	12	4								0	0	0	1		1	11	3										1
67	35	0	0	0	0	0	0		0				0			0		0		0	12	4			0	0		1			0	0		0	1	11	5		0	1		1	1		1	0	0
68	35	20	15	0	0	0	0	0	0				0		0	0	0	0		0	12	7			1	0	0	0	0	0	0	0	0	0	1	11	9			0	0	0					0
69	49	20	5	0	0	0	0		0			0	0		0	0	0	0	0	0	12	8		0			0	0	0	0	0	0	0	0	0	12	9					0			0		0
70	31	0	0	0	0	1	0	0	1		0		0			0	0	0	1	2	10	6	0					1				0	0		1	11	3	0							1
71	46	25	10	0	0	1	0		1	0	0			0			1	0		2	10	4			0	0		1			0	0		0	1	11	5		0	1		1	1		1	0	0
72	31	10	5	0	0	0	0					1	0					0		1	11	2													0	12	0
73	34	0	0	0	0	0	0						1	1	0	0	0	0		2	10	4				0		1			1	0	0		2	10	3				1		1
74	50	0	0	0	0	1	0				0	0				1		0	1	2	10	3					1	1		1	1				4	8	0		0	1	0	1			1		1
75	30	10	10	0	0	0	0										0	0		0	12	2					1			0			0		1	11	2					1						0
76	22	6	10	0	0	0	0	0	0	0	0	0				0	0	0		0	12	8		0	0	0	0				0				0	12	5		0	0						0
77	53	35	10	1	0	0	0	0	0	0	0	1	0	0	0			0	0	1	11	9			0	0		0		0	0	0		0	0	12	7				0		1		0			0
78	35	20	10	0	0	0	0				0				0		0	0	1	1	11	4								1		1			2	10	0								1
79	38	18	6	0	0	0	0					1								1	11	0				0	1	0							1	11	2					1	1
80	51	30	15	0	0	0	0				1				0	0	0	0	0	1	11	5						1		0		0		1	2	10	2		1				1		0		0		1
81	51	33	8	0	0	0	0	0				1	0		0		0	0	1	2	10	5									1			1	2	10	0												1
82	60	0	0	0	0	0	0		1							0	0	0	0	1	11	4	0	0	0				0		0	0	0	0	0	12	8		0	0				0		0	0
83	46	20	10	0	0	0	0		1									1		2	10	0										0			0	12	1
84	42	25	10	0	0	0	0	0			0				0	0	0	0		0	12	6					1	0		0	0	0	0	1	2	10	5					0	1		0	0	0		1
85	51	35	20	1	0	1	1	1					1				1			3	9	0							1			1	1		3	9	0	1							1				1
86	62	0	0	0	1	0	1	0			0		0		0		0			0	12	5					0	1					0		1	11	2			1
87	32	18	10	0	0	0	0				0	0	0		0	0	0	0		0	12	7		0		0	0	0	0	0		0	0		0	12	8				0		1		0			0
88	33	17	10	0	0	1	0				0					0	1	0	1	2	10	3				1							0	1	2	10	1											0	1
89	36	15	0	1	0	1	0		0		0	1	0	0	0	0	0		1	2	10	7		0		0	1	0	1	0		0	0	1	3	9	6				0								1
90	36	22	7	0	0	1	1										0	0		0	12	2	0			0	1	0		0		0			1	11	5						1		0
91	27	13	20	1	0	1	0				0		0		0	0	0	0	0	0	12	7				0				0	0	0	0	1	1	11	5					0		0	0	0	0	0	1
92	41	20	10	0	0	1	0			0	0	0	0	0	0	0	0	0	0	0	12	10		0	0	0	0	0	0	0	0	0	0	0	0	12	11		0	0	0	0	0		0	0	0	0
93	41	0	0	0	0	0	0					1			0		0	0		1	11	3					1			1			0	1	3	9	1					0
94	48	30	10	0	0	0	0					1	1						1	3	9	0				1	1	1		1				1	5	7	0						1						1
95	30	15	8	0	0	0	0		0		0	1	0		0	0	0		1	2	10	6					1	0			0	0	0	1	2	10	4					1			0				1
96	30	10	10	0	0	0	0						1						1	2	10	0						1						1	2	10	0						1						1
97	46	33	10	0	0	0	1									1			1	2	10	0					1							1	2	10	0	1											1
98	28	12	0	0	0	0	0	0	1			0	1	1		0	1	0		4	8	4	0			0						0	0		0	12	4					1
99	29	15	10	1	0	1	0			0	0	0			0				1	1	11	4								0				1	1	11	1								1				1
100	57	40	10	0	0	0	0	0		0	0	0	0	0	0	0	0	0	0	0	12	11	0	0			0	0		0	0	0	0	0	0	12	9				1	1				0	0	1
101	49	30	5	0	0	0	0	1					1							2	10	0						1	1						2	10	0						1
102	33	10	4	0	0	1	1											0		0	12	1	1			1		1		0					3	9	1				1					1			1
103	43	4	2	0	0	0	0	0					0		0		0	0	1	1	11	5						1					0		1	11	1										1
104	38	10	8	0	0	0	0			0	0	1	0	0		0		0		1	11	6			1		1								2	10	0					1
105	33	0	0	0	0	0	0								0	0	0			0	12	3													0	12	0
106	56	0	0	0	0	0	0	0							1					1	11	1				0	0			1					1	11	2	0				1
107	50	20	8	0	0	0	0						1						1	2	10	0						1				0	0	1	2	10	2	0			0		1		0				1
108	45	25	0	0	0	1	0									1		1		2	10	0									1		1		2	10	0									1		1
109	28	10	5	0	0	0	0																				A												A					D	B
110	56	0	0	0	0	0	0
111	52	30	3	0	0	0	0
112	28	0	0	0	0	0	0							A											A	B			A											A			B	A				A	C
113	57	15	0	0	0	0	0
114	58	41	15	0	0	0	0	C				C											C															C					B
115	59	29	10	0	0	0	0			D																																		D					B
[truncated: 3 more columns]

## Sheet: Sheet2
B	A	C	C	C	D	B	A	B	A	C	C

## Sheet: backups
																				The results of wearing an N95 mask															The results of wearing a surgical mask
participant	age	length of smoking	Number of daily smoking	hyposmia	catch a cold in the past two weeks	rhinitis	operation	1	2	3	4	5	6	7	8	9	10	11	12	correct	wrong	blank	1	2	3	4	5	6	7	8	9	10	11	12	correct	wrong	blank	1	2	3	4	5	6	7	8	9	10	11	12
1	45	28	10	1	0	1	0	0	0	A	B	A	B	D	C	0	0	0	B	0	12	5	C	C	A	B	0	D	C	0	0	B	A	B	1	11	3	C	C	0	B	0	B	D	0	0	C	A	B
2	38	20	10	0	0	1	0	A	C	A	0	A	0	A	0	0	0	0	B	0	12	6	C	C	0	B	C	B	D	0	0	C	0	0	1	11	5	C	C	D	B	A	B	D	0	0	0	0	B
3	48	30	10	0	0	0	0	0	B	A	A	A	0	D	0	C	0	A	B	0	12	4	0	C	A	D	A	B	D	0	A	C	D	B	0	12	2	B	C	A	D	A	C	D	0	C	C	A	A
4	40	20	10	0	0	1	0	C	C	A	B	A	B	D	C	C	0	A	B	0	12	1	C	C	A	B	A	B	D	C	C	0	A	B	0	12	1	C	C	A	B	A	B	D	C	C	C	A	B
5	39	24	10	0	0	0	0	C	C	D	B	A	B	A	B	A	B	A	C	1	11	0	C	C	D	B	A	B	D	B	D	B	A	B	0	12	0	C	C	D	B	A	B	D	C	D	B	A	C
6	40	15	0	1	0	1	1	C	0	A	B	A	B	D	C	C	C	A	B	0	12	1	C	B	A	B	A	C	D	A	A	B	B	B	1	11	0	A	B	A	B	C	B	D	C	B	B	A	B
7	62	0	0	0	0	1	0	0	C	B	A	0	0	0	0	D	0	0	A	0	12	7	0	C	B	C	0	0	0	0	0	0	0	A	1	11	8	0	0	C	D	0	C	D	B	0	A	D	A
8	30	17	10	0	0	1	0	A	B	A	0	A	0	A	0	0	0	A	C	1	11	5	0	C	C	D	A	D	A	B	0	0	B	B	2	10	3	C	C	A	0	A	B	A	C	D	C	B	B
9	49	0	0	0	0	0	0	0	C	A	0	A	0	D	C	C	C	A	B	0	12	3	0	C	A	B	A	0	D	C	C	B	A	B	0	12	2	0	C	A	B	A	B	D	C	C	B	A	B
10	47	34	15	0	1	1	1	0	B	A	0	0	0	0	0	0	0	0	B	0	12	9	0	C	D	0	A	B	A	0	0	0	0	B	0	12	6	C	C	C	B	A	B	A	0	D	C	0	B
11	29	15	5	0	0	0	0	0	D	C	A	A	D	B	A	C	D	0	B	4	8	2	C	C	A	B	C	D	D	A	A	C	A	C	4	8	0	C	C	A	A	C	D	D	B	C	B	C	C
12	49	30	5	0	0	0	0	C	C	A	B	C	B	D	B	C	0	A	B	1	11	1	C	C	A	B	C	0	D	A	0	B	B	B	2	10	2	C	B	A	B	C	B	D	A	C	B	A	B
13	36	15	10	0	0	0	0	C	0	0	D	0	A	D	A	0	0	0	B	0	12	6	C	0	A	0	0	0	D	0	0	C	B	0	0	12	7	C	C	A	C	A	B	D	0	C	0	0	B
14	40	26	0	0	0	0	0	C	C	A	B	C	0	D	C	C	A	0	B	2	10	2	B	C	D	B	A	D	D	C	A	A	0	B	3	9	1	B	C	A	B	0	D	D	0	C	0	0	B
15	41	18	3	0	0	0	0	C	B	A	B	C	B	D	B	C	B	D	B	1	11	0	C	C	A	B	C	B	D	C	C	B	C	B	+	10	0	C	C	A	B	C	B	D	B	C	B	D	B
16	51	40	12	0	0	1	0	0	C	A	B	A	C	0	B	B	D	A	B	1	11	2	C	C	A	B	C	C	D	0	D	0	A	B	1	11	2	B	C	A	B	B	B	D	0	D	0	A	B
17	32	15	10	0	0	0	0	0	A	A	A	A	0	B	0	C	0	0	B	2	10	5	C	0	A	B	C	0	D	A	C	0	0	B	2	10	4	C	B	A	A	C	B	A	A	D	B	0	C
18	47	27	10	0	0	0	0	C	C	A	B	C	B	D	A	A	C	0	B	1	11	1	C	C	A	B	C	0	D	A	A	0	0	B	2	10	3	C	B	A	B	C	B	D	0	A	0	A	B
19	52	30	10	0	1	0	0	C	B	A	B	B	B	D	B	C	D	A	B	0	12	0	C	C	D	B	A	C	A	A	A	B	A	B	1	11	0	C	C	A	B	C	B	A	B	B	B	A	B
20	38	15	20	0	0	1	1	C	C	A	0	0	0	D	0	0	0	0	0	0	12	8	C	B	D	0	A	B	D	0	0	A	0	C	2	10	4	A	C	D	A	A	B	D	0	0	0	A	B
21	31	13	10	0	0	1	0	0	0	0	0	A	0	A	0	0	0	0	A	0	12	9	0	C	D	B	C	B	D	0	D	B	0	B	1	11	3	0	C	D	B	0	B	D	0	C	C	0	C
22	52	23	14	1	1	1	0	A	C	C	0	A	C	D	D	C	0	0	C	2	10	3	0	A	C	A	D	A	A	D	D	0	0	C	3	9	3	A	A	B	0	C	C	D	0	C	B	0	B
23	36	20	20	0	0	1	0	C	C	A	B	A	B	D	C	A	A	B	C	2	10	0	C	C	A	B	A	B	D	A	0	A	A	B	2	10	1	C	C	A	B	C	B	D	C	C	B	A	B
24	56	40	10	0	0	0	0	C	B	A	B	C	B	D	A	A	C	B	D	1	11	0	C	C	C	B	C	B	A	A	A	C	A	B	3	9	0	D	B	A	C	C	B	A	C	C	B	C	B
25	21	4	10	0	1	0	0	C	B	A	B	A	D	D	A	C	C	A	B	1	11	0	C	B	A	B	A	D	A	B	C	B	C	B	2	10	0	C	B	A	B	A	B	A	C	D	B	A	B
26	32	20	5	0	0	0	0	0	0	D	B	A	D	D	B	D	C	0	C	2	10	3	0	B	A	B	0	0	D	0	D	0	C	C	2	10	5	C	B	A	D	A	B	A	0	D	C	A	C
27	31	15	10	0	0	1	1	C	B	A	B	A	B	D	A	C	0	0	0	0	12	3	D	C	A	D	C	0	D	A	A	0	B	C	3	9	2	C	C	A	D	C	B	D	0	C	0	C	C
28	50	0	0	0	0	0	0	B	C	A	B	A	0	D	0	C	0	0	B	1	11	4	B	C	A	B	A	C	D	A	C	0	0	A	2	10	2	B	C	A	B	A	D	B	B	B	B	D	A
29	34	15	10	0	0	1	0	D	C	A	0	A	A	0	A	C	0	D	B	1	11	3	C	C	A	A	A	B	C	D	0	B	C	B	1	11	1	C	C	A	A	A	B	D	B	0	0	C	B
30	36	18	10	0	0	0	0	0	0	A	D	0	0	D	0	0	0	0	0	0	12	9	C	C	A	D	D	0	D	B	0	0	0	C	1	11	4	C	C	A	D	C	B	D	A	C	B	A	C
31	43	25	15	0	0	0	0	C	B	A	0	A	0	D	B	C	B	C	C	2	10	2	D	C	A	0	D	C	A	A	C	D	A	C	2	10	1	D	C	A	C	D	D	D	A	C	0	A	C
32	38	0	0	0	0	1	0	C	C	A	B	A	D	A	A	A	A	0	B	3	9	1	C	C	A	B	A	D	A	A	A	C	B	B	2	10	0	C	C	A	B	A	B	A	A	A	C	0	B
33	38	22	50	0	0	0	0	B	0	B	C	C	B	D	B	C	0	A	B	3	9	2	C	C	C	0	B	0	D	A	D	0	0	B	2	10	4	A	D	C	0	C	B	D	0	C	0	0	B
34	41	20	5	0	0	0	0	A	B	A	B	0	C	A	C	0	0	0	B	0	12	4	C	B	A	0	0	C	0	0	C	B	0	B	0	12	5	B	A	A	C	B	D	A	B	C	A	D	B
35	49	0	0	0	0	0	0	0	C	A	C	0	B	A	0	0	C	A	B	1	11	4	C	C	A	C	A	C	A	C	D	0	A	C	2	10	1	C	B	A	C	A	B	A	A	C	A	A	B
36	25	0	0	0	0	0	0	C	B	A	B	C	D	D	A	C	C	A	C	3	9	0	C	C	A	D	D	D	D	C	D	B	A	C	2	10	0	C	C	A	A	A	D	D	A	D	D	C	C
37	51	20	6	0	0	1	0	C	C	A	0	A	0	D	0	D	B	A	B	0	12	3	C	C	A	B	A	D	D	0	D	B	A	B	1	11	1	C	C	A	A	C	D	D	B	0	B	A	B
38	32	17	15	0	0	0	0	C	C	A	B	A	B	D	0	C	0	0	B	0	12	3	C	D	A	B	A	B	A	0	0	0	0	B	0	12	4	C	B	A	B	A	B	D	C	0	0	0	B
39	50	22	10	0	0	1	0	0	A	B	D	B	B	0	C	C	D	0	D	1	11	3	0	A	A	C	B	C	0	0	D	0	C	B	3	9	4	0	B	B	B	A	A	B	C	D	B	B	C
40	50	30	6	0	0	0	0	C	C	A	A	C	B	D	B	C	A	A	B	2	10	0	C	C	A	B	C	B	D	C	C	A	B	B	2	10	0	C	C	A	B	C	B	D	C	A	B	A	B
41	56	30	7	0	0	1	0	0	D	A	A	A	0	D	B	C	0	B	B	0	12	3	B	C	A	A	A	D	D	A	C	B	B	A	3	9	0	C	C	B	C	A	B	D	C	C	C	A	B
42	32	15	10	0	1	0	0	C	C	A	B	C	B	D	B	C	0	A	B	1	11	1	C	C	A	B	C	B	D	0	0	B	B	B	1	11	2	C	C	A	B	C	B	D	0	C	B	A	B
43	42	17	0	0	0	1	0	0	0	A	0	0	0	0	0	0	0	0	0	0	12	11	0	C	A	0	A	0	D	0	0	0	0	C	1	11	7	C	0	A	0	0	B	D	0	0	0	0	C
44	54	30	0	0	0	0	0	C	C	C	0	0	0	D	C	0	0	0	0	1	11	7	B	B	A	B	A	C	D	A	A	A	B	C	4	8	0	A	B	C	B	C	B	D	B	C	B	A	C
45	28	0	0	0	0	0	0	C	C	A	B	A	A	D	A	A	B	A	B	0	12	0	C	C	A	B	B	C	D	A	C	A	A	B	2	10	0	C	C	A	B	A	B	D	A	C	C	A	B
46	32	17	10	0	0	1	0	0	C	A	0	0	0	A	0	0	0	0	C	1	11	8	0	C	A	0	0	C	D	0	0	0	0	C	1	11	7	C	C	A	0	0	B	D	0	0	C	A	C
47	44	5	0	0	0	0	0	C	C	A	A	A	0	D	C	0	A	A	B	1	11	2	C	C	A	0	A	0	D	A	C	0	B	B	1	11	3	C	C	A	0	A	B	D	A	C	D	A	B
48	42	25	10	0	0	0	1	0	C	0	0	0	B	C	A	D	0	0	B	0	12	6	A	0	B	0	C	0	0	0	0	0	0	B	1	11	8	C	C	0	0	B	B	D	0	C	D	A	B
49	26	10	5	0	0	0	0	0	C	A	B	A	0	0	A	A	0	A	B	1	11	4	C	C	A	B	C	0	A	C	0	0	B	C	2	10	3	C	C	A	0	A	D	D	0	0	0	A	B
50	47	30	10	0	0	0	0	0	C	A	0	A	0	D	0	C	0	A	C	1	11	5	0	B	A	0	A	0	0	0	B	B	B	C	2	10	5	A	D	A	B	D	C	C	B	C	C	A	C
51	49	0	0	0	0	0	0	C	B	A	0	C	B	B	0	A	B	A	C	3	9	2	C	C	A	B	A	C	D	0	D	B	0	C	1	11	2	D	C	A	0	0	B	D	A	D	B	A	C
52	59	0	0	0	0	0	0	0	0	0	0	0	0	A	0	0	0	0	A	0	12	10	0	0	0	0	A	0	C	0	0	0	0	0	0	12	10	0	0	A	C	C	C	0	0	0	C	C	A
53	37	10	3	0	0	0	0	C	C	A	A	C	B	D	C	C	A	B	B	2	10	0	C	C	A	A	C	B	D	C	C	A	B	B	2	10	0	C	C	A	B	C	D	D	C	C	A	B	B
54	44	27	20	0	0	0	0	C	0	A	0	A	B	B	0	C	0	A	C	2	10	4	C	D	A	D	A	0	A	B	0	0	B	B	0	12	3	C	D	A	0	C	0	B	C	D	0	B	B
55	28	8	6	0	0	0	1	C	C	A	B	A	B	D	A	C	C	A	C	1	11	0	C	B	A	B	A	B	D	A	C	C	A	C	2	10	0	C	C	A	B	A	B	D	A	C	C	A	B
56	33	11	0	0	0	0	0	0	B	0	B	0	B	0	0	C	0	0	C	1	11	7	0	B	A	B	C	B	0	0	C	C	0	B	1	11	4	0	C	A	B	A	A	D	0	C	C	A	B
57	42	20	10	0	0	0	0	B	B	A	B	A	D	A	B	C	B	A	B	2	10	0	B	B	A	B	A	D	A	B	C	B	A	B	2	10	0	B	D	A	A	A	D	D	B	C	B	A	B
58	32	17	12	0	0	1	0	C	C	A	B	A	D	D	0	C	0	A	B	1	11	2	C	B	A	B	A	B	D	0	0	0	0	B	0	12	4	A	B	A	B	C	B	D	0	C	0	A	B
59	28	8	5	0	0	0	0	C	C	D	C	A	B	A	B	B	B	C	B	3	9	0	C	C	D	C	A	B	D	D	B	B	C	B	3	9	0	C	C	D	B	A	B	D	C	A	B	A	C
60	35	20	9	0	0	0	0	C	C	D	A	B	C	D	0	0	0	B	C	1	11	3	B	D	C	C	D	D	D	0	D	D	D	D	4	8	1	A	D	D	D	D	A	D	0	0	C	A	C
61	27	11	7	0	0	0	0	C	B	A	B	A	B	A	B	D	B	B	B	0	12	0	C	C	A	B	C	A	D	B	D	B	C	B	2	10	0	C	C	A	A	C	A	A	C	D	B	C	B
62	39	20	10	0	0	1	1	C	C	A	B	C	B	A	B	C	0	0	B	1	11	2	C	C	A	B	C	B	A	A	0	0	A	0	2	10	3	C	C	A	B	0	B	D	0	C	0	A	B
63	29	10	5	0	0	1	0	0	C	D	0	C	C	A	B	C	B	A	B	1	11	2	0	C	D	0	C	C	A	0	C	0	0	B	1	11	5	B	C	A	0	C	D	A	0	C	0	A	B
64	29	12	5	0	0	1	0	C	C	A	B	A	A	D	B	D	A	B	B	1	11	0	C	C	A	0	A	D	D	0	D	C	B	B	1	11	2	C	C	A	A	C	D	D	A	D	C	B	B
65	38	20	12	0	0	0	0	0	C	A	B	A	B	D	0	0	0	0	C	1	11	5	C	C	A	B	A	B	D	0	C	0	A	B	0	12	2	C	C	A	B	A	D	D	0	0	0	A	B
66	29	0	0	0	0	0	0	C	D	A	B	A	A	D	0	0	0	0	B	0	12	4	C	D	A	B	A	A	D	0	0	0	C	B	1	11	3	C	D	A	B	A	B	D	C	C	A	A	B
67	35	0	0	0	0	0	0	C	0	A	B	A	0	C	A	0	B	0	D	0	12	4	C	C	0	0	A	D	A	D	0	0	A	0	1	11	5	A	0	C	D	C	D	C	A	0	0	A	D
68	35	20	15	0	0	0	0	0	0	A	A	A	0	A	0	0	0	0	A	0	12	7	C	C	C	0	0	0	0	0	0	0	0	0	1	11	9	C	C	0	0	0	A	D	C	C	0	A	B
69	49	20	5	0	0	0	0	C	0	A	B	0	0	D	0	0	0	0	0	0	12	8	C	0	A	B	0	0	0	0	0	0	0	0	0	12	9	C	C	A	B	0	B	D	0	C	0	A	B
70	31	0	0	0	0	1	0	0	A	B	0	D	0	D	A	0	0	0	C	2	10	6	0	C	A	B	A	D	D	B	D	0	0	B	1	11	3	0	C	A	D	A	B	D	A	C	B	A	B
71	46	25	10	0	0	1	0	C	A	0	0	A	A	0	C	D	A	0	D	2	10	4	C	C	0	0	A	D	A	D	0	0	A	0	1	11	5	A	0	C	D	C	D	C	A	0	0	A	D
72	31	10	5	0	0	0	0	C	C	A	B	C	0	D	B	C	B	0	B	1	11	2	C	C	A	B	A	B	D	C	C	C	A	B	0	12	0	C	C	A	B	A	B	D	C	C	C	A	B
73	34	0	0	0	0	0	0	A	C	A	B	A	D	B	0	0	0	0	A	2	10	4	C	C	A	0	A	D	D	C	B	0	0	B	2	10	3	C	C	D	C	A	D	A	C	C	B	A	B
74	50	0	0	0	0	1	0	C	C	A	0	0	B	D	A	B	C	0	C	2	10	3	C	C	D	B	C	D	D	A	B	C	A	B	4	8	0	C	0	C	0	C	C	D	A	A	A	A	B
75	30	10	10	0	0	0	0	C	C	A	B	A	B	D	A	C	0	0	B	0	12	2	C	C	A	B	C	B	C	0	C	C	0	B	1	11	2	C	C	A	B	C	B	D	B	C	C	0	B
76	22	6	10	0	0	0	0	0	0	0	0	0	B	A	C	0	0	0	B	0	12	8	C	0	0	0	0	B	D	C	0	C	A	B	0	12	5	C	0	0	B	A	B	A	C	0	C	A	B
77	53	35	10	1	0	0	0	0	0	0	0	C	0	0	0	D	B	0	0	1	11	9	C	C	0	0	A	0	A	0	0	0	B	0	0	12	7	C	C	A	0	A	D	D	0	D	D	0	B
78	35	20	10	0	0	0	0	C	B	A	0	A	B	D	0	A	0	0	C	1	11	4	C	C	A	B	B	C	D	A	C	A	A	B	2	10	0	C	C	A	B	A	B	D	A	C	C	A	B
79	38	18	6	0	0	0	0	C	C	A	B	C	B	D	B	D	C	D	B	1	11	0	C	C	A	0	C	0	D	C	A	C	D	B	1	11	2	C	C	A	A	C	D	D	C	D	C	D	B
80	51	30	15	0	0	0	0	C	B	A	C	A	C	D	0	0	0	0	0	1	11	5	C	C	A	D	A	D	D	0	C	0	A	C	2	10	2	A	A	A	D	A	D	D	0	C	0	A	C
81	51	33	8	0	0	0	0	0	C	D	B	C	0	D	0	C	0	0	C	2	10	5	C	B	A	B	A	C	D	B	B	B	D	C	2	10	0	C	C	A	B	A	A	D	B	C	B	B	C
82	60	0	0	0	0	0	0	A	A	A	A	A	B	C	B	0	0	0	0	1	11	4	0	0	0	D	B	B	0	C	0	0	0	0	0	12	8	C	0	0	B	A	B	0	C	0	0	B	B
83	46	20	10	0	0	0	0	C	A	A	B	A	B	D	C	C	B	C	B	2	10	0	C	C	A	B	A	B	D	C	C	0	A	B	0	12	1	C	C	A	B	A	B	D	C	C	C	A	B
84	42	25	10	0	0	0	0	0	C	A	0	A	B	D	0	0	0	0	B	0	12	6	C	C	A	D	C	0	D	0	0	0	0	C	2	10	5	C	C	A	B	0	D	D	0	0	0	A	C
85	51	35	20	1	0	1	1	B	B	A	D	A	D	A	C	A	A	A	B	3	9	0	A	B	D	B	A	B	B	C	A	A	C	B	3	9	0	B	B	A	A	A	B	D	A	C	D	A	C
86	62	0	0	0	1	0	1	0	D	A	0	A	0	A	0	C	0	D	B	0	12	5	C	C	A	A	0	D	D	B	D	B	0	B	1	11	2	C	D	C	B	B	B	C	B	D	D	A	B
87	32	18	10	0	0	0	0	C	C	A	0	0	0	D	0	0	0	0	B	0	12	7	A	0	A	0	0	0	0	0	C	0	0	B	0	12	8	C	C	A	0	A	D	D	0	C	B	0	B
88	33	17	10	0	0	1	0	C	C	D	0	A	C	D	C	0	A	0	C	2	10	3	C	C	D	C	A	B	D	C	C	B	0	C	2	10	1	C	C	D	D	A	B	D	C	C	B	0	C
89	36	15	0	1	0	1	0	C	0	A	0	C	0	0	0	0	0	A	C	2	10	7	C	0	A	0	C	0	B	0	D	0	0	C	3	9	6	C	C	A	0	A	B	D	C	D	B	A	C
90	36	22	7	0	0	1	1	C	C	A	A	A	B	D	A	A	0	0	B	0	12	2	0	C	D	0	C	0	D	0	D	0	A	B	1	11	5	C	C	D	A	A	D	D	0	A	B	A	B
91	27	13	20	1	0	1	0	C	C	A	0	B	0	D	0	0	0	0	0	0	12	7	C	C	A	0	A	B	D	0	0	0	0	C	1	11	5	C	C	A	A	0	B	0	0	0	0	0	C
92	41	20	10	0	0	1	0	A	D	0	0	0	0	0	0	0	0	0	0	0	12	10	C	0	0	0	0	0	0	0	0	0	0	0	0	12	11	C	0	0	0	0	0	D	0	0	0	0	B
93	41	0	0	0	0	0	0	C	C	A	B	C	B	D	0	D	0	0	B	1	11	3	C	C	A	B	C	A	D	A	D	B	0	C	3	9	1	C	C	A	B	0	B	D	C	D	B	A	B
94	48	30	10	0	0	0	0	C	B	A	A	C	D	D	B	D	B	A	C	3	9	0	C	B	A	C	C	D	D	A	D	B	A	C	5	7	0	C	C	A	A	A	D	D	C	D	C	A	C
95	30	15	8	0	0	0	0	C	0	A	0	C	0	D	0	0	0	B	C	2	10	6	C	C	A	B	C	0	D	C	0	0	0	C	2	10	4	C	C	A	B	C	B	D	0	C	B	A	C
96	30	10	10	0	0	0	0	C	B	A	B	A	D	A	B	D	C	A	C	2	10	0	C	C	A	B	A	D	A	B	D	C	A	C	2	10	0	C	C	A	B	A	D	A	B	D	C	A	C
97	46	33	10	0	0	0	1	C	D	A	D	A	B	D	B	B	D	A	C	2	10	0	A	C	A	A	C	B	D	C	C	B	A	C	2	10	0	B	C	A	A	A	B	D	B	C	B	A	C
98	28	12	0	0	0	0	0	0	A	A	B	0	D	B	D	0	A	0	D	4	8	4	0	C	D	0	B	B	C	D	C	0	0	B	0	12	4	C	B	A	B	C	B	D	B	C	C	A	B
99	29	15	10	1	0	1	0	C	C	0	0	0	B	D	0	D	C	B	C	1	11	4	C	C	A	D	D	B	A	0	C	B	B	C	1	11	1	C	C	A	B	A	B	D	A	D	B	B	C
100	57	40	10	0	0	0	0	0	B	0	0	0	0	0	0	0	0	0	0	0	12	11	0	0	A	D	0	0	D	0	0	0	0	0	0	12	9	A	B	D	C	C	B	D	C	0	0	C	A
101	49	30	5	0	0	0	0	B	D	A	A	A	D	A	B	D	B	A	B	2	10	0	C	C	A	A	A	D	B	C	C	D	D	B	2	10	0	C	C	A	B	A	D	D	C	C	C	A	B
102	33	10	4	0	0	1	1	C	C	A	A	A	C	D	D	A	C	0	B	0	12	1	B	C	A	C	A	D	D	0	D	B	D	B	3	9	1	C	C	A	C	A	B	D	B	B	D	D	C
103	43	4	2	0	0	0	0	0	C	A	B	A	0	D	0	C	0	0	C	1	11	5	C	C	D	B	A	D	D	B	D	B	0	B	1	11	1	C	C	A	B	B	A	D	C	C	A	A	B
104	38	10	8	0	0	0	0	C	B	0	0	C	0	0	B	0	B	0	A	1	11	6	C	C	C	B	C	B	D	B	C	B	D	B	2	10	0	C	C	A	B	C	B	D	B	C	B	A	B
105	33	0	0	0	0	0	0	C	C	A	B	A	B	D	0	0	0	A	B	0	12	3	C	C	A	B	A	B	D	C	C	B	A	B	0	12	0	C	C	A	B	A	B	D	C	C	B	A	B
106	56	0	0	0	0	0	0	0	C	A	B	A	C	A	A	C	C	B	D	1	11	1	A	B	D	0	0	C	A	A	C	D	B	D	1	11	2	0	C	A	B	C	C	D	C	C	B	A	B
107	50	20	8	0	0	0	0	C	C	A	B	A	D	D	A	C	C	A	C	2	10	0	C	B	A	B	A	D	A	B	C	0	0	C	2	10	2	0	C	A	0	A	D	D	0	C	C	A	C
108	45	25	0	0	0	1	0	C	C	A	B	A	B	A	C	B	B	C	B	2	10	0	C	C	A	B	A	B	A	C	B	B	C	B	2	10	0	C	C	A	B	A	B	A	C	B	C	C	B
																				1.05556	10.9444	3.5													1.53763	10.5185	2.75
109	28	10	5	0	0	0	0																				A												A					D	B
110	56	0	0	0	0	0	0
111	52	30	3	0	0	0	0
112	28	0	0	0	0	0	0							A											A	B			A											A			B	A				A	C
113	57	15	0	0	0	0	0
114	58	41	15	0	0	0	0	C				C											C															C					B
115	59	29	10	0	0	0	0			D																																		D					B
[truncated: 3 more columns]

## Sheet: Sheet3
C	C	A	B	A	B	D	C	C	B	A	B

## Sheet: backups2
年龄	烟龄	日吸烟数	嗅觉减退	近两周有无感冒	鼻炎	手术	participant	1	2	3	4	5	6	7	8	9	10	11	12	correct	wrong	blank	1	2	3	4	5	6	7	8	9	10	11	12	correct	wrong	blank	1	2	3	4	5	6	7	8	9	10	11	12
48	30	10	0	0	0	0	1	0	B	A	A	A	0	D	0	C	0	A	B	0	12	4	0	C	A	D	A	B	D	0	A	C	D	B	0	12	2	B	C	A	D	A	C	D	0	C	C	A	A
57	40	10	0	0	0	0	2	0	B	0	0	0	0	0	0	0	0	0	0	0	12	11	0	0	A	D	0	0	D	0	0	0	0	0	0	12	9	A	B	D	C	C	B	D	C	0	0	C	A
59	0	0	0	0	0	0	3	0	0	0	0	0	0	A	0	0	0	0	A	0	12	10	0	0	0	0	A	0	C	0	0	0	0	0	0	12	10	0	0	A	C	C	C	0	0	0	C	C	A
62	0	0	0	0	1	0	4	0	C	B	A	0	0	0	0	D	0	0	A	0	12	7	0	C	B	C	0	0	0	0	0	0	0	A	1	11	8	0	0	C	D	0	C	D	B	0	A	D	A
50	0	0	0	0	0	0	5	B	C	A	B	A	0	D	0	C	0	0	B	1	11	4	B	C	A	B	A	C	D	A	C	0	0	A	2	10	2	B	C	A	B	A	D	B	B	B	B	D	A
41	20	10	0	0	1	0	6	A	D	0	0	0	0	0	0	0	0	0	0	0	12	10	C	0	0	0	0	0	0	0	0	0	0	0	0	12	11	C	0	0	0	0	0	D	0	0	0	0	B
38	20	10	0	0	1	0	7	A	C	A	0	A	0	A	0	0	0	0	B	0	12	6	C	C	0	B	C	B	D	0	0	C	0	0	1	11	5	C	C	D	B	A	B	D	0	0	0	0	B
32	17	15	0	0	0	0	8	C	C	A	B	A	B	D	0	C	0	0	B	0	12	3	C	D	A	B	A	B	A	0	0	0	0	B	0	12	4	C	B	A	B	A	B	D	C	0	0	0	B
36	15	10	0	0	0	0	9	C	0	0	D	0	A	D	A	0	0	0	B	0	12	6	C	0	A	0	0	0	D	0	0	C	B	0	0	12	7	C	C	A	C	A	B	D	0	C	0	0	B
38	22	50	0	0	0	0	10	B	0	B	C	C	B	D	B	C	0	A	B	3	9	2	C	C	C	0	B	0	D	A	D	0	0	B	2	10	4	A	D	C	0	C	B	D	0	C	0	0	B
40	26	0	0	0	0	0	11	C	C	A	B	C	0	D	C	C	A	0	B	2	10	2	B	C	D	B	A	D	D	C	A	A	0	B	3	9	1	B	C	A	B	0	D	D	0	C	0	0	B
52	23	14	1	1	1	0	12	A	C	C	0	A	C	D	D	C	0	0	C	2	10	3	0	A	C	A	D	A	A	D	D	0	0	C	3	9	3	A	A	B	0	C	C	D	0	C	B	0	B
32	18	10	0	0	0	0	13	C	C	A	0	0	0	D	0	0	0	0	B	0	12	7	A	0	A	0	0	0	0	0	C	0	0	B	0	12	8	C	C	A	0	A	D	D	0	C	B	0	B
38	0	0	0	0	1	0	14	C	C	A	B	A	D	A	A	A	A	0	B	3	9	1	C	C	A	B	A	D	A	A	A	C	B	B	2	10	0	C	C	A	B	A	B	A	A	A	C	0	B
30	10	10	0	0	0	0	15	C	C	A	B	A	B	D	A	C	0	0	B	0	12	2	C	C	A	B	C	B	C	0	C	C	0	B	1	11	2	C	C	A	B	C	B	D	B	C	C	0	B
47	34	15	0	1	1	1	16	0	B	A	0	0	0	0	0	0	0	0	B	0	12	9	0	C	D	0	A	B	A	0	0	0	0	B	0	12	6	C	C	C	B	A	B	A	0	D	C	0	B
53	35	10	1	0	0	0	17	0	0	0	0	C	0	0	0	D	B	0	0	1	11	9	C	C	0	0	A	0	A	0	0	0	B	0	0	12	7	C	C	A	0	A	D	D	0	D	D	0	B
38	15	20	0	0	1	1	18	C	C	A	0	0	0	D	0	0	0	0	0	0	12	8	C	B	D	0	A	B	D	0	0	A	0	C	2	10	4	A	C	D	A	A	B	D	0	0	0	A	B
26	10	5	0	0	0	0	19	0	C	A	B	A	0	0	A	A	0	A	B	1	11	4	C	C	A	B	C	0	A	C	0	0	B	C	2	10	3	C	C	A	0	A	D	D	0	0	0	A	B
38	20	12	0	0	0	0	20	0	C	A	B	A	B	D	0	0	0	0	C	1	11	5	C	C	A	B	A	B	D	0	C	0	A	B	0	12	2	C	C	A	B	A	D	D	0	0	0	A	B
47	27	10	0	0	0	0	21	C	C	A	B	C	B	D	A	A	C	0	B	1	11	1	C	C	A	B	C	0	D	A	A	0	0	B	2	10	3	C	B	A	B	C	B	D	0	A	0	A	B
29	10	5	0	0	1	0	22	0	C	D	0	C	C	A	B	C	B	A	B	1	11	2	0	C	D	0	C	C	A	0	C	0	0	B	1	11	5	B	C	A	0	C	D	A	0	C	0	A	B
39	20	10	0	0	1	1	23	C	C	A	B	C	B	A	B	C	0	0	B	1	11	2	C	C	A	B	C	B	A	A	0	0	A	0	2	10	3	C	C	A	B	0	B	D	0	C	0	A	B
49	20	5	0	0	0	0	24	C	0	A	B	0	0	D	0	0	0	0	0	0	12	8	C	0	A	B	0	0	0	0	0	0	0	0	0	12	9	C	C	A	B	0	B	D	0	C	0	A	B
32	17	12	0	0	1	0	25	C	C	A	B	A	D	D	0	C	0	A	B	1	11	2	C	B	A	B	A	B	D	0	0	0	0	B	0	12	4	A	B	A	B	C	B	D	0	C	0	A	B
35	20	15	0	0	0	0	26	0	0	A	A	A	0	A	0	0	0	0	A	0	12	7	C	C	C	0	0	0	0	0	0	0	0	0	1	11	9	C	C	0	0	0	A	D	C	C	0	A	B
51	40	12	0	0	1	0	27	0	C	A	B	A	C	0	B	B	D	A	B	1	11	2	C	C	A	B	C	C	D	0	D	0	A	B	1	11	2	B	C	A	B	B	B	D	0	D	0	A	B
50	0	0	0	0	1	0	28	C	C	A	0	0	B	D	A	B	C	0	C	2	10	3	C	C	D	B	C	D	D	A	B	C	A	B	4	8	0	C	0	C	0	C	C	D	A	A	A	A	B
49	0	0	0	0	0	0	29	0	C	A	C	0	B	A	0	0	C	A	B	1	11	4	C	C	A	C	A	C	A	C	D	0	A	C	2	10	1	C	B	A	C	A	B	A	A	C	A	A	B
43	4	2	0	0	0	0	30	0	C	A	B	A	0	D	0	C	0	0	C	1	11	5	C	C	D	B	A	D	D	B	D	B	0	B	1	11	1	C	C	A	B	B	A	D	C	C	A	A	B
29	0	0	0	0	0	0	31	C	D	A	B	A	A	D	0	0	0	0	B	0	12	4	C	D	A	B	A	A	D	0	0	0	C	B	1	11	3	C	D	A	B	A	B	D	C	C	A	A	B
51	20	6	0	0	1	0	32	C	C	A	0	A	0	D	0	D	B	A	B	0	12	3	C	C	A	B	A	D	D	0	D	B	A	B	1	11	1	C	C	A	A	C	D	D	B	0	B	A	B
36	22	7	0	0	1	1	33	C	C	A	A	A	B	D	A	A	0	0	B	0	12	2	0	C	D	0	C	0	D	0	D	0	A	B	1	11	5	C	C	D	A	A	D	D	0	A	B	A	B
50	30	6	0	0	0	0	34	C	C	A	A	C	B	D	B	C	A	A	B	2	10	0	C	C	A	B	C	B	D	C	C	A	B	B	2	10	0	C	C	A	B	C	B	D	C	A	B	A	B
52	30	10	0	1	0	0	35	C	B	A	B	B	B	D	B	C	D	A	B	0	12	0	C	C	D	B	A	C	A	A	A	B	A	B	1	11	0	C	C	A	B	C	B	A	B	B	B	A	B
40	15	0	1	0	1	1	36	C	0	A	B	A	B	D	C	C	C	A	B	0	12	1	C	B	A	B	A	C	D	A	A	B	B	B	1	11	0	A	B	A	B	C	B	D	C	B	B	A	B
32	15	10	0	1	0	0	37	C	C	A	B	C	B	D	B	C	0	A	B	1	11	1	C	C	A	B	C	B	D	0	0	B	B	B	1	11	2	C	C	A	B	C	B	D	0	C	B	A	B
31	0	0	0	0	1	0	38	0	A	B	0	D	0	D	A	0	0	0	C	2	10	6	0	C	A	B	A	D	D	B	D	0	0	B	1	11	3	0	C	A	D	A	B	D	A	C	B	A	B
49	30	5	0	0	0	0	39	C	C	A	B	C	B	D	B	C	0	A	B	1	11	1	C	C	A	B	C	0	D	A	0	B	B	B	2	10	2	C	B	A	B	C	B	D	A	C	B	A	B
38	10	8	0	0	0	0	40	C	B	0	0	C	0	0	B	0	B	0	A	1	11	6	C	C	C	B	C	B	D	B	C	B	D	B	2	10	0	C	C	A	B	C	B	D	B	C	B	A	B
42	20	10	0	0	0	0	41	B	B	A	B	A	D	A	B	C	B	A	B	2	10	0	B	B	A	B	A	D	A	B	C	B	A	B	2	10	0	B	D	A	A	A	D	D	B	C	B	A	B
34	0	0	0	0	0	0	42	A	C	A	B	A	D	B	0	0	0	0	A	2	10	4	C	C	A	0	A	D	D	C	B	0	0	B	2	10	3	C	C	D	C	A	D	A	C	C	B	A	B
49	0	0	0	0	0	0	43	0	C	A	0	A	0	D	C	C	C	A	B	0	12	3	0	C	A	B	A	0	D	C	C	B	A	B	0	12	2	0	C	A	B	A	B	D	C	C	B	A	B
33	0	0	0	0	0	0	44	C	C	A	B	A	B	D	0	0	0	A	B	0	12	3	C	C	A	B	A	B	D	C	C	B	A	B	0	12	0	C	C	A	B	A	B	D	C	C	B	A	B
36	20	20	0	0	1	0	45	C	C	A	B	A	B	D	C	A	A	B	C	2	10	0	C	C	A	B	A	B	D	A	0	A	A	B	2	10	1	C	C	A	B	C	B	D	C	C	B	A	B
56	0	0	0	0	0	0	46	0	C	A	B	A	C	A	A	C	C	B	D	1	11	1	A	B	D	0	0	C	A	A	C	D	B	D	1	11	2	0	C	A	B	C	C	D	C	C	B	A	B
21	4	10	0	1	0	0	47	C	B	A	B	A	D	D	A	C	C	A	B	1	11	0	C	B	A	B	A	D	A	B	C	B	C	B	2	10	0	C	B	A	B	A	B	A	C	D	B	A	B
41	0	0	0	0	0	0	48	C	C	A	B	C	B	D	0	D	0	0	B	1	11	3	C	C	A	B	C	A	D	A	D	B	0	C	3	9	1	C	C	A	B	0	B	D	C	D	B	A	B
45	28	10	1	0	1	0	49	0	0	A	B	A	B	D	C	0	0	0	B	0	12	5	C	C	A	B	0	D	C	0	0	B	A	B	1	11	3	C	C	0	B	0	B	D	0	0	C	A	B
22	6	10	0	0	0	0	50	0	0	0	0	0	B	A	C	0	0	0	B	0	12	8	C	0	0	0	0	B	D	C	0	C	A	B	0	12	5	C	0	0	B	A	B	A	C	0	C	A	B
33	11	0	0	0	0	0	51	0	B	0	B	0	B	0	0	C	0	0	C	1	11	7	0	B	A	B	C	B	0	0	C	C	0	B	1	11	4	0	C	A	B	A	A	D	0	C	C	A	B
28	0	0	0	0	0	0	52	C	C	A	B	A	A	D	A	A	B	A	B	0	12	0	C	C	A	B	B	C	D	A	C	A	A	B	2	10	0	C	C	A	B	A	B	D	A	C	C	A	B
28	8	6	0	0	0	1	53	C	C	A	B	A	B	D	A	C	C	A	C	1	11	0	C	B	A	B	A	B	D	A	C	C	A	C	2	10	0	C	C	A	B	A	B	D	A	C	C	A	B
35	20	10	0	0	0	0	54	C	B	A	0	A	B	D	0	A	0	0	C	1	11	4	C	C	A	B	B	C	D	A	C	A	A	B	2	10	0	C	C	A	B	A	B	D	A	C	C	A	B
28	12	0	0	0	0	0	55	0	A	A	B	0	D	B	D	0	A	0	D	4	8	4	0	C	D	0	B	B	C	D	C	0	0	B	0	12	4	C	B	A	B	C	B	D	B	C	C	A	B
40	20	10	0	0	1	0	56	C	C	A	B	A	B	D	C	C	0	A	B	0	12	1	C	C	A	B	A	B	D	C	C	0	A	B	0	12	1	C	C	A	B	A	B	D	C	C	C	A	B
31	10	5	0	0	0	0	57	C	C	A	B	C	0	D	B	C	B	0	B	1	11	2	C	C	A	B	A	B	D	C	C	C	A	B	0	12	0	C	C	A	B	A	B	D	C	C	C	A	B
46	20	10	0	0	0	0	58	C	A	A	B	A	B	D	C	C	B	C	B	2	10	0	C	C	A	B	A	B	D	C	C	0	A	B	0	12	1	C	C	A	B	A	B	D	C	C	C	A	B
56	30	7	0	0	1	0	59	0	D	A	A	A	0	D	B	C	0	B	B	0	12	3	B	C	A	A	A	D	D	A	C	B	B	A	3	9	0	C	C	B	C	A	B	D	C	C	C	A	B
49	30	5	0	0	0	0	60	B	D	A	A	A	D	A	B	D	B	A	B	2	10	0	C	C	A	A	A	D	B	C	C	D	D	B	2	10	0	C	C	A	B	A	D	D	C	C	C	A	B
42	25	10	0	0	0	1	61	0	C	0	0	0	B	C	A	D	0	0	B	0	12	6	A	0	B	0	C	0	0	0	0	0	0	B	1	11	8	C	C	0	0	B	B	D	0	C	D	A	B
44	5	0	0	0	0	0	62	C	C	A	A	A	0	D	C	0	A	A	B	1	11	2	C	C	A	0	A	0	D	A	C	0	B	B	1	11	3	C	C	A	0	A	B	D	A	C	D	A	B
62	0	0	0	1	0	1	63	0	D	A	0	A	0	A	0	C	0	D	B	0	12	5	C	C	A	A	0	D	D	B	D	B	0	B	1	11	2	C	D	C	B	B	B	C	B	D	D	A	B
60	0	0	0	0	0	0	64	A	A	A	A	A	B	C	B	0	0	0	0	1	11	4	0	0	0	D	B	B	0	C	0	0	0	0	0	12	8	C	0	0	B	A	B	0	C	0	0	B	B
44	27	20	0	0	0	0	65	C	0	A	0	A	B	B	0	C	0	A	C	2	10	4	C	D	A	D	A	0	A	B	0	0	B	B	0	12	3	C	D	A	0	C	0	B	C	D	0	B	B
37	10	3	0	0	0	0	66	C	C	A	A	C	B	D	C	C	A	B	B	2	10	0	C	C	A	A	C	B	D	C	C	A	B	B	2	10	0	C	C	A	B	C	D	D	C	C	A	B	B
29	12	5	0	0	1	0	67	C	C	A	B	A	A	D	B	D	A	B	B	1	11	0	C	C	A	0	A	D	D	0	D	C	B	B	1	11	2	C	C	A	A	C	D	D	A	D	C	B	B
30	17	10	0	0	1	0	68	A	B	A	0	A	0	A	0	0	0	A	C	1	11	5	0	C	C	D	A	D	A	B	0	0	B	B	2	10	3	C	C	A	0	A	B	A	C	D	C	B	B
34	15	10	0	0	1	0	69	D	C	A	0	A	A	0	A	C	0	D	B	1	11	3	C	C	A	A	A	B	C	D	0	B	C	B	1	11	1	C	C	A	A	A	B	D	B	0	0	C	B
56	40	10	0	0	0	0	70	C	B	A	B	C	B	D	A	A	C	B	D	1	11	0	C	C	C	B	C	B	A	A	A	C	A	B	3	9	0	D	B	A	C	C	B	A	C	C	B	C	B
27	11	7	0	0	0	0	71	C	B	A	B	A	B	A	B	D	B	B	B	0	12	0	C	C	A	B	C	A	D	B	D	B	C	B	2	10	0	C	C	A	A	C	A	A	C	D	B	C	B
45	25	0	0	0	1	0	72	C	C	A	B	A	B	A	C	B	B	C	B	2	10	0	C	C	A	B	A	B	A	C	B	B	C	B	2	10	0	C	C	A	B	A	B	A	C	B	C	C	B
41	20	5	0	0	0	0	73	A	B	A	B	0	C	A	C	0	0	0	B	0	12	4	C	B	A	0	0	C	0	0	C	B	0	B	0	12	5	B	A	A	C	B	D	A	B	C	A	D	B
41	18	3	0	0	0	0	74	C	B	A	B	C	B	D	B	C	B	D	B	1	11	0	C	C	A	B	C	B	D	C	C	B	C	B	+	10	0	C	C	A	B	C	B	D	B	C	B	D	B
38	18	6	0	0	0	0	75	C	C	A	B	C	B	D	B	D	C	D	B	1	11	0	C	C	A	0	C	0	D	C	A	C	D	B	1	11	2	C	C	A	A	C	D	D	C	D	C	D	B
59	29	10	0	0	0	0	76			D																																		D					B
27	13	20	1	0	1	0	77	C	C	A	0	B	0	D	0	0	0	0	0	0	12	7	C	C	A	0	A	B	D	0	0	0	0	C	1	11	5	C	C	A	A	0	B	0	0	0	0	0	C
42	17	0	0	0	1	0	78	0	0	A	0	0	0	0	0	0	0	0	0	0	12	11	0	C	A	0	A	0	D	0	0	0	0	C	1	11	7	C	0	A	0	0	B	D	0	0	0	0	C
33	17	10	0	0	1	0	79	C	C	D	0	A	C	D	C	0	A	0	C	2	10	3	C	C	D	C	A	B	D	C	C	B	0	C	2	10	1	C	C	D	D	A	B	D	C	C	B	0	C
32	15	10	0	0	0	0	80	0	A	A	A	A	0	B	0	C	0	0	B	2	10	5	C	0	A	B	C	0	D	A	C	0	0	B	2	10	4	C	B	A	A	C	B	A	A	D	B	0	C
31	13	10	0	0	1	0	81	0	0	0	0	A	0	A	0	0	0	0	A	0	12	9	0	C	D	B	C	B	D	0	D	B	0	B	1	11	3	0	C	D	B	0	B	D	0	C	C	0	C
42	25	10	0	0	0	0	82	0	C	A	0	A	B	D	0	0	0	0	B	0	12	6	C	C	A	D	C	0	D	0	0	0	0	C	2	10	5	C	C	A	B	0	D	D	0	0	0	A	C
51	30	15	0	0	0	0	83	C	B	A	C	A	C	D	0	0	0	0	0	1	11	5	C	C	A	D	A	D	D	0	C	0	A	C	2	10	2	A	A	A	D	A	D	D	0	C	0	A	C
43	25	15	0	0	0	0	84	C	B	A	0	A	0	D	B	C	B	C	C	2	10	2	D	C	A	0	D	C	A	A	C	D	A	C	2	10	1	D	C	A	C	D	D	D	A	C	0	A	C
28	8	5	0	0	0	0	85	C	C	D	C	A	B	A	B	B	B	C	B	3	9	0	C	C	D	C	A	B	D	D	B	B	C	B	3	9	0	C	C	D	B	A	B	D	C	A	B	A	C
30	15	8	0	0	0	0	86	C	0	A	0	C	0	D	0	0	0	B	C	2	10	6	C	C	A	B	C	0	D	C	0	0	0	C	2	10	4	C	C	A	B	C	B	D	0	C	B	A	C
36	18	10	0	0	0	0	87	0	0	A	D	0	0	D	0	0	0	0	0	0	12	9	C	C	A	D	D	0	D	B	0	0	0	C	1	11	4	C	C	A	D	C	B	D	A	C	B	A	C
46	33	10	0	0	0	1	88	C	D	A	D	A	B	D	B	B	D	A	C	2	10	0	A	C	A	A	C	B	D	C	C	B	A	C	2	10	0	B	C	A	A	A	B	D	B	C	B	A	C
54	30	0	0	0	0	0	89	C	C	C	0	0	0	D	C	0	0	0	0	1	11	7	B	B	A	B	A	C	D	A	A	A	B	C	4	8	0	A	B	C	B	C	B	D	B	C	B	A	C
49	0	0	0	0	0	0	90	C	B	A	0	C	B	B	0	A	B	A	C	3	9	2	C	C	A	B	A	C	D	0	D	B	0	C	1	11	2	D	C	A	0	0	B	D	A	D	B	A	C
36	15	0	1	0	1	0	91	C	0	A	0	C	0	0	0	0	0	A	C	2	10	7	C	0	A	0	C	0	B	0	D	0	0	C	3	9	6	C	C	A	0	A	B	D	C	D	B	A	C
39	24	10	0	0	0	0	92	C	C	D	B	A	B	A	B	A	B	A	C	1	11	0	C	C	D	B	A	B	D	B	D	B	A	B	0	12	0	C	C	D	B	A	B	D	C	D	B	A	C
35	20	9	0	0	0	0	93	C	C	D	A	B	C	D	0	0	0	B	C	1	11	3	B	D	C	C	D	D	D	0	D	D	D	D	4	8	1	A	D	D	D	D	A	D	0	0	C	A	C
32	17	10	0	0	1	0	94	0	C	A	0	0	0	A	0	0	0	0	C	1	11	8	0	C	A	0	0	C	D	0	0	0	0	C	1	11	7	C	C	A	0	0	B	D	0	0	C	A	C
50	20	8	0	0	0	0	95	C	C	A	B	A	D	D	A	C	C	A	C	2	10	0	C	B	A	B	A	D	A	B	C	0	0	C	2	10	2	0	C	A	0	A	D	D	0	C	C	A	C
47	30	10	0	0	0	0	96	0	C	A	0	A	0	D	0	C	0	A	C	1	11	5	0	B	A	0	A	0	0	0	B	B	B	C	2	10	5	A	D	A	B	D	C	C	B	C	C	A	C
32	20	5	0	0	0	0	97	0	0	D	B	A	D	D	B	D	C	0	C	2	10	3	0	B	A	B	0	0	D	0	D	0	C	C	2	10	5	C	B	A	D	A	B	A	0	D	C	A	C
30	10	10	0	0	0	0	98	C	B	A	B	A	D	A	B	D	C	A	C	2	10	0	C	C	A	B	A	D	A	B	D	C	A	C	2	10	0	C	C	A	B	A	D	A	B	D	C	A	C
48	30	10	0	0	0	0	99	C	B	A	A	C	D	D	B	D	B	A	C	3	9	0	C	B	A	C	C	D	D	A	D	B	A	C	5	7	0	C	C	A	A	A	D	D	C	D	C	A	C
51	35	20	1	0	1	1	100	B	B	A	D	A	D	A	C	A	A	A	B	3	9	0	A	B	D	B	A	B	B	C	A	A	C	B	3	9	0	B	B	A	A	A	B	D	A	C	D	A	C
28	0	0	0	0	0	0	101							A											A	B			A											A			B	A				A	C
51	33	8	0	0	0	0	102	0	C	D	B	C	0	D	0	C	0	0	C	2	10	5	C	B	A	B	A	C	D	B	B	B	D	C	2	10	0	C	C	A	B	A	A	D	B	C	B	B	C
29	15	10	1	0	1	0	103	C	C	0	0	0	B	D	0	D	C	B	C	1	11	4	C	C	A	D	D	B	A	0	C	B	B	C	1	11	1	C	C	A	B	A	B	D	A	D	B	B	C
50	22	10	0	0	1	0	104	0	A	B	D	B	B	0	C	C	D	0	D	1	11	3	0	A	A	C	B	C	0	0	D	0	C	B	3	9	4	0	B	B	B	A	A	B	C	D	B	B	C
31	15	10	0	0	1	1	105	C	B	A	B	A	B	D	A	C	0	0	0	0	12	3	D	C	A	D	C	0	D	A	A	0	B	C	3	9	2	C	C	A	D	C	B	D	0	C	0	C	C
29	15	5	0	0	0	0	106	0	D	C	A	A	D	B	A	C	D	0	B	4	8	2	C	C	A	B	C	D	D	A	A	C	A	C	4	8	0	C	C	A	A	C	D	D	B	C	B	C	C
25	0	0	0	0	0	0	107	C	B	A	B	C	D	D	A	C	C	A	C	3	9	0	C	C	A	D	D	D	D	C	D	B	A	C	2	10	0	C	C	A	A	A	D	D	A	D	D	C	C
33	10	4	0	0	1	1	108	C	C	A	A	A	C	D	D	A	C	0	B	0	12	1	B	C	A	C	A	D	D	0	D	B	D	B	3	9	1	C	C	A	C	A	B	D	B	B	D	D	C
35	0	0	0	0	0	0	109	C	0	A	B	A	0	C	A	0	B	0	D	0	12	4	C	C	0	0	A	D	A	D	0	0	A	0	1	11	5	A	0	C	D	C	D	C	A	0	0	A	D
46	25	10	0	0	1	0	110	C	A	0	0	A	A	0	C	D	A	0	D	2	10	4	C	C	0	0	A	D	A	D	0	0	A	0	1	11	5	A	0	C	D	C	D	C	A	0	0	A	D
28	10	5	0	0	0	0	111																				A												A					D	B
58	41	15	0	0	0	0	112	C				C											C															C					B
																				1.09615	10.9038	3.32692													1.57955	10.4712	2.57692
56	0	0	0	0	0	0	113
52	30	3	0	0	0	0	114
57	15	0	0	0	0	0	115
[truncated: 3 more columns]

## Sheet: backups3
年龄	烟龄	日吸烟数	嗅觉减退	近两周有无感冒	鼻炎	手术	participant	1	2	3	4	5	6	7	8	9	10	11	12	correct	wrong	blank	1	2	3	4	5	6	7	8	9	10	11	12	correct	wrong	blank	1	2	3	4	5	6	7	8	9	10	11	12
48	30	10	0	0	0	0	1	0	B	A	A	A	0	D	0	C	0	A	B	0	12	4	0	C	A	D	A	B	D	0	A	C	D	B	0	12	2	B	C	A	D	A	C	D	0	C	C	A	A
57	40	10	0	0	0	0	2	0	B	0	0	0	0	0	0	0	0	0	0	0	12	11	0	0	A	D	0	0	D	0	0	0	0	0	0	12	9	A	B	D	C	C	B	D	C	0	0	C	A
59	0	0	0	0	0	0	3	0	0	0	0	0	0	A	0	0	0	0	A	0	12	10	0	0	0	0	A	0	C	0	0	0	0	0	0	12	10	0	0	A	C	C	C	0	0	0	C	C	A
62	0	0	0	0	1	0	4	0	C	B	A	0	0	0	0	D	0	0	A	0	12	7	0	C	B	C	0	0	0	0	0	0	0	A	1	11	8	0	0	C	D	0	C	D	B	0	A	D	A
50	0	0	0	0	0	0	5	B	C	A	B	A	0	D	0	C	0	0	B	1	11	4	B	C	A	B	A	C	D	A	C	0	0	A	2	10	2	B	C	A	B	A	D	B	B	B	B	D	A
41	20	10	0	0	1	0	6	A	D	0	0	0	0	0	0	0	0	0	0	0	12	10	C	0	0	0	0	0	0	0	0	0	0	0	0	12	11	C	0	0	0	0	0	D	0	0	0	0	B
38	20	10	0	0	1	0	7	A	C	A	0	A	0	A	0	0	0	0	B	0	12	6	C	C	0	B	C	B	D	0	0	C	0	0	1	11	5	C	C	D	B	A	B	D	0	0	0	0	B
32	17	15	0	0	0	0	8	C	C	A	B	A	B	D	0	C	0	0	B	0	12	3	C	D	A	B	A	B	A	0	0	0	0	B	0	12	4	C	B	A	B	A	B	D	C	0	0	0	B
36	15	10	0	0	0	0	9	C	0	0	D	0	A	D	A	0	0	0	B	0	12	6	C	0	A	0	0	0	D	0	0	C	B	0	0	12	7	C	C	A	C	A	B	D	0	C	0	0	B
38	22	50	0	0	0	0	10	B	0	B	C	C	B	D	B	C	0	A	B	3	9	2	C	C	C	0	B	0	D	A	D	0	0	B	2	10	4	A	D	C	0	C	B	D	0	C	0	0	B
40	26	0	0	0	0	0	11	C	C	A	B	C	0	D	C	C	A	0	B	2	10	2	B	C	D	B	A	D	D	C	A	A	0	B	3	9	1	B	C	A	B	0	D	D	0	C	0	0	B
52	23	14	1	1	1	0	12	A	C	C	0	A	C	D	D	C	0	0	C	2	10	3	0	A	C	A	D	A	A	D	D	0	0	C	3	9	3	A	A	B	0	C	C	D	0	C	B	0	B
32	18	10	0	0	0	0	13	C	C	A	0	0	0	D	0	0	0	0	B	0	12	7	A	0	A	0	0	0	0	0	C	0	0	B	0	12	8	C	C	A	0	A	D	D	0	C	B	0	B
38	0	0	0	0	1	0	14	C	C	A	B	A	D	A	A	A	A	0	B	3	9	1	C	C	A	B	A	D	A	A	A	C	B	B	2	10	0	C	C	A	B	A	B	A	A	A	C	0	B
30	10	10	0	0	0	0	15	C	C	A	B	A	B	D	A	C	0	0	B	0	12	2	C	C	A	B	C	B	C	0	C	C	0	B	1	11	2	C	C	A	B	C	B	D	B	C	C	0	B
47	34	15	0	1	1	1	16	0	B	A	0	0	0	0	0	0	0	0	B	0	12	9	0	C	D	0	A	B	A	0	0	0	0	B	0	12	6	C	C	C	B	A	B	A	0	D	C	0	B
53	35	10	1	0	0	0	17	0	0	0	0	C	0	0	0	D	B	0	0	1	11	9	C	C	0	0	A	0	A	0	0	0	B	0	0	12	7	C	C	A	0	A	D	D	0	D	D	0	B
38	15	20	0	0	1	1	18	C	C	A	0	0	0	D	0	0	0	0	0	0	12	8	C	B	D	0	A	B	D	0	0	A	0	C	2	10	4	A	C	D	A	A	B	D	0	0	0	A	B
26	10	5	0	0	0	0	19	0	C	A	B	A	0	0	A	A	0	A	B	1	11	4	C	C	A	B	C	0	A	C	0	0	B	C	2	10	3	C	C	A	0	A	D	D	0	0	0	A	B
38	20	12	0	0	0	0	20	0	C	A	B	A	B	D	0	0	0	0	C	1	11	5	C	C	A	B	A	B	D	0	C	0	A	B	0	12	2	C	C	A	B	A	D	D	0	0	0	A	B
47	27	10	0	0	0	0	21	C	C	A	B	C	B	D	A	A	C	0	B	1	11	1	C	C	A	B	C	0	D	A	A	0	0	B	2	10	3	C	B	A	B	C	B	D	0	A	0	A	B
29	10	5	0	0	1	0	22	0	C	D	0	C	C	A	B	C	B	A	B	1	11	2	0	C	D	0	C	C	A	0	C	0	0	B	1	11	5	B	C	A	0	C	D	A	0	C	0	A	B
39	20	10	0	0	1	1	23	C	C	A	B	C	B	A	B	C	0	0	B	1	11	2	C	C	A	B	C	B	A	A	0	0	A	0	2	10	3	C	C	A	B	0	B	D	0	C	0	A	B
49	20	5	0	0	0	0	24	C	0	A	B	0	0	D	0	0	0	0	0	0	12	8	C	0	A	B	0	0	0	0	0	0	0	0	0	12	9	C	C	A	B	0	B	D	0	C	0	A	B
32	17	12	0	0	1	0	25	C	C	A	B	A	D	D	0	C	0	A	B	1	11	2	C	B	A	B	A	B	D	0	0	0	0	B	0	12	4	A	B	A	B	C	B	D	0	C	0	A	B
35	20	15	0	0	0	0	26	0	0	A	A	A	0	A	0	0	0	0	A	0	12	7	C	C	C	0	0	0	0	0	0	0	0	0	1	11	9	C	C	0	0	0	A	D	C	C	0	A	B
51	40	12	0	0	1	0	27	0	C	A	B	A	C	0	B	B	D	A	B	1	11	2	C	C	A	B	C	C	D	0	D	0	A	B	1	11	2	B	C	A	B	B	B	D	0	D	0	A	B
50	0	0	0	0	1	0	28	C	C	A	0	0	B	D	A	B	C	0	C	2	10	3	C	C	D	B	C	D	D	A	B	C	A	B	4	8	0	C	0	C	0	C	C	D	A	A	A	A	B
49	0	0	0	0	0	0	29	0	C	A	C	0	B	A	0	0	C	A	B	1	11	4	C	C	A	C	A	C	A	C	D	0	A	C	2	10	1	C	B	A	C	A	B	A	A	C	A	A	B
43	4	2	0	0	0	0	30	0	C	A	B	A	0	D	0	C	0	0	C	1	11	5	C	C	D	B	A	D	D	B	D	B	0	B	1	11	1	C	C	A	B	B	A	D	C	C	A	A	B
29	0	0	0	0	0	0	31	C	D	A	B	A	A	D	0	0	0	0	B	0	12	4	C	D	A	B	A	A	D	0	0	0	C	B	1	11	3	C	D	A	B	A	B	D	C	C	A	A	B
51	20	6	0	0	1	0	32	C	C	A	0	A	0	D	0	D	B	A	B	0	12	3	C	C	A	B	A	D	D	0	D	B	A	B	1	11	1	C	C	A	A	C	D	D	B	0	B	A	B
36	22	7	0	0	1	1	33	C	C	A	A	A	B	D	A	A	0	0	B	0	12	2	0	C	D	0	C	0	D	0	D	0	A	B	1	11	5	C	C	D	A	A	D	D	0	A	B	A	B
50	30	6	0	0	0	0	34	C	C	A	A	C	B	D	B	C	A	A	B	2	10	0	C	C	A	B	C	B	D	C	C	A	B	B	2	10	0	C	C	A	B	C	B	D	C	A	B	A	B
52	30	10	0	1	0	0	35	C	B	A	B	B	B	D	B	C	D	A	B	0	12	0	C	C	D	B	A	C	A	A	A	B	A	B	1	11	0	C	C	A	B	C	B	A	B	B	B	A	B
40	15	0	1	0	1	1	36	C	0	A	B	A	B	D	C	C	C	A	B	0	12	1	C	B	A	B	A	C	D	A	A	B	B	B	1	11	0	A	B	A	B	C	B	D	C	B	B	A	B
32	15	10	0	1	0	0	37	C	C	A	B	C	B	D	B	C	0	A	B	1	11	1	C	C	A	B	C	B	D	0	0	B	B	B	1	11	2	C	C	A	B	C	B	D	0	C	B	A	B
31	0	0	0	0	1	0	38	0	A	B	0	D	0	D	A	0	0	0	C	2	10	6	0	C	A	B	A	D	D	B	D	0	0	B	1	11	3	0	C	A	D	A	B	D	A	C	B	A	B
49	30	5	0	0	0	0	39	C	C	A	B	C	B	D	B	C	0	A	B	1	11	1	C	C	A	B	C	0	D	A	0	B	B	B	2	10	2	C	B	A	B	C	B	D	A	C	B	A	B
38	10	8	0	0	0	0	40	C	B	0	0	C	0	0	B	0	B	0	A	1	11	6	C	C	C	B	C	B	D	B	C	B	D	B	2	10	0	C	C	A	B	C	B	D	B	C	B	A	B
42	20	10	0	0	0	0	41	B	B	A	B	A	D	A	B	C	B	A	B	2	10	0	B	B	A	B	A	D	A	B	C	B	A	B	2	10	0	B	D	A	A	A	D	D	B	C	B	A	B
34	0	0	0	0	0	0	42	A	C	A	B	A	D	B	0	0	0	0	A	2	10	4	C	C	A	0	A	D	D	C	B	0	0	B	2	10	3	C	C	D	C	A	D	A	C	C	B	A	B
49	0	0	0	0	0	0	43	0	C	A	0	A	0	D	C	C	C	A	B	0	12	3	0	C	A	B	A	0	D	C	C	B	A	B	0	12	2	0	C	A	B	A	B	D	C	C	B	A	B
33	0	0	0	0	0	0	44	C	C	A	B	A	B	D	0	0	0	A	B	0	12	3	C	C	A	B	A	B	D	C	C	B	A	B	0	12	0	C	C	A	B	A	B	D	C	C	B	A	B
36	20	20	0	0	1	0	45	C	C	A	B	A	B	D	C	A	A	B	C	2	10	0	C	C	A	B	A	B	D	A	0	A	A	B	2	10	1	C	C	A	B	C	B	D	C	C	B	A	B
56	0	0	0	0	0	0	46	0	C	A	B	A	C	A	A	C	C	B	D	1	11	1	A	B	D	0	0	C	A	A	C	D	B	D	1	11	2	0	C	A	B	C	C	D	C	C	B	A	B
21	4	10	0	1	0	0	47	C	B	A	B	A	D	D	A	C	C	A	B	1	11	0	C	B	A	B	A	D	A	B	C	B	C	B	2	10	0	C	B	A	B	A	B	A	C	D	B	A	B
41	0	0	0	0	0	0	48	C	C	A	B	C	B	D	0	D	0	0	B	1	11	3	C	C	A	B	C	A	D	A	D	B	0	C	3	9	1	C	C	A	B	0	B	D	C	D	B	A	B
45	28	10	1	0	1	0	49	0	0	A	B	A	B	D	C	0	0	0	B	0	12	5	C	C	A	B	0	D	C	0	0	B	A	B	1	11	3	C	C	0	B	0	B	D	0	0	C	A	B
22	6	10	0	0	0	0	50	0	0	0	0	0	B	A	C	0	0	0	B	0	12	8	C	0	0	0	0	B	D	C	0	C	A	B	0	12	5	C	0	0	B	A	B	A	C	0	C	A	B
33	11	0	0	0	0	0	51	0	B	0	B	0	B	0	0	C	0	0	C	1	11	7	0	B	A	B	C	B	0	0	C	C	0	B	1	11	4	0	C	A	B	A	A	D	0	C	C	A	B
28	0	0	0	0	0	0	52	C	C	A	B	A	A	D	A	A	B	A	B	0	12	0	C	C	A	B	B	C	D	A	C	A	A	B	2	10	0	C	C	A	B	A	B	D	A	C	C	A	B
28	8	6	0	0	0	1	53	C	C	A	B	A	B	D	A	C	C	A	C	1	11	0	C	B	A	B	A	B	D	A	C	C	A	C	2	10	0	C	C	A	B	A	B	D	A	C	C	A	B
35	20	10	0	0	0	0	54	C	B	A	0	A	B	D	0	A	0	0	C	1	11	4	C	C	A	B	B	C	D	A	C	A	A	B	2	10	0	C	C	A	B	A	B	D	A	C	C	A	B
28	12	0	0	0	0	0	55	0	A	A	B	0	D	B	D	0	A	0	D	4	8	4	0	C	D	0	B	B	C	D	C	0	0	B	0	12	4	C	B	A	B	C	B	D	B	C	C	A	B
40	20	10	0	0	1	0	56	C	C	A	B	A	B	D	C	C	0	A	B	0	12	1	C	C	A	B	A	B	D	C	C	0	A	B	0	12	1	C	C	A	B	A	B	D	C	C	C	A	B
31	10	5	0	0	0	0	57	C	C	A	B	C	0	D	B	C	B	0	B	1	11	2	C	C	A	B	A	B	D	C	C	C	A	B	0	12	0	C	C	A	B	A	B	D	C	C	C	A	B
46	20	10	0	0	0	0	58	C	A	A	B	A	B	D	C	C	B	C	B	2	10	0	C	C	A	B	A	B	D	C	C	0	A	B	0	12	1	C	C	A	B	A	B	D	C	C	C	A	B
56	30	7	0	0	1	0	59	0	D	A	A	A	0	D	B	C	0	B	B	0	12	3	B	C	A	A	A	D	D	A	C	B	B	A	3	9	0	C	C	B	C	A	B	D	C	C	C	A	B
49	30	5	0	0	0	0	60	B	D	A	A	A	D	A	B	D	B	A	B	2	10	0	C	C	A	A	A	D	B	C	C	D	D	B	2	10	0	C	C	A	B	A	D	D	C	C	C	A	B
42	25	10	0	0	0	1	61	0	C	0	0	0	B	C	A	D	0	0	B	0	12	6	A	0	B	0	C	0	0	0	0	0	0	B	1	11	8	C	C	0	0	B	B	D	0	C	D	A	B
44	5	0	0	0	0	0	62	C	C	A	A	A	0	D	C	0	A	A	B	1	11	2	C	C	A	0	A	0	D	A	C	0	B	B	1	11	3	C	C	A	0	A	B	D	A	C	D	A	B
62	0	0	0	1	0	1	63	0	D	A	0	A	0	A	0	C	0	D	B	0	12	5	C	C	A	A	0	D	D	B	D	B	0	B	1	11	2	C	D	C	B	B	B	C	B	D	D	A	B
60	0	0	0	0	0	0	64	A	A	A	A	A	B	C	B	0	0	0	0	1	11	4	0	0	0	D	B	B	0	C	0	0	0	0	0	12	8	C	0	0	B	A	B	0	C	0	0	B	B
44	27	20	0	0	0	0	65	C	0	A	0	A	B	B	0	C	0	A	C	2	10	4	C	D	A	D	A	0	A	B	0	0	B	B	0	12	3	C	D	A	0	C	0	B	C	D	0	B	B
37	10	3	0	0	0	0	66	C	C	A	A	C	B	D	C	C	A	B	B	2	10	0	C	C	A	A	C	B	D	C	C	A	B	B	2	10	0	C	C	A	B	C	D	D	C	C	A	B	B
29	12	5	0	0	1	0	67	C	C	A	B	A	A	D	B	D	A	B	B	1	11	0	C	C	A	0	A	D	D	0	D	C	B	B	1	11	2	C	C	A	A	C	D	D	A	D	C	B	B
30	17	10	0	0	1	0	68	A	B	A	0	A	0	A	0	0	0	A	C	1	11	5	0	C	C	D	A	D	A	B	0	0	B	B	2	10	3	C	C	A	0	A	B	A	C	D	C	B	B
34	15	10	0	0	1	0	69	D	C	A	0	A	A	0	A	C	0	D	B	1	11	3	C	C	A	A	A	B	C	D	0	B	C	B	1	11	1	C	C	A	A	A	B	D	B	0	0	C	B
56	40	10	0	0	0	0	70	C	B	A	B	C	B	D	A	A	C	B	D	1	11	0	C	C	C	B	C	B	A	A	A	C	A	B	3	9	0	D	B	A	C	C	B	A	C	C	B	C	B
27	11	7	0	0	0	0	71	C	B	A	B	A	B	A	B	D	B	B	B	0	12	0	C	C	A	B	C	A	D	B	D	B	C	B	2	10	0	C	C	A	A	C	A	A	C	D	B	C	B
45	25	0	0	0	1	0	72	C	C	A	B	A	B	A	C	B	B	C	B	2	10	0	C	C	A	B	A	B	A	C	B	B	C	B	2	10	0	C	C	A	B	A	B	A	C	B	C	C	B
41	20	5	0	0	0	0	73	A	B	A	B	0	C	A	C	0	0	0	B	0	12	4	C	B	A	0	0	C	0	0	C	B	0	B	0	12	5	B	A	A	C	B	D	A	B	C	A	D	B
41	18	3	0	0	0	0	74	C	B	A	B	C	B	D	B	C	B	D	B	1	11	0	C	C	A	B	C	B	D	C	C	B	C	B	+	10	0	C	C	A	B	C	B	D	B	C	B	D	B
38	18	6	0	0	0	0	75	C	C	A	B	C	B	D	B	D	C	D	B	1	11	0	C	C	A	0	C	0	D	C	A	C	D	B	1	11	2	C	C	A	A	C	D	D	C	D	C	D	B
27	13	20	1	0	1	0	76	C	C	A	0	B	0	D	0	0	0	0	0	0	12	7	C	C	A	0	A	B	D	0	0	0	0	C	1	11	5	C	C	A	A	0	B	0	0	0	0	0	C
42	17	0	0	0	1	0	77	0	0	A	0	0	0	0	0	0	0	0	0	0	12	11	0	C	A	0	A	0	D	0	0	0	0	C	1	11	7	C	0	A	0	0	B	D	0	0	0	0	C
33	17	10	0	0	1	0	78	C	C	D	0	A	C	D	C	0	A	0	C	2	10	3	C	C	D	C	A	B	D	C	C	B	0	C	2	10	1	C	C	D	D	A	B	D	C	C	B	0	C
32	15	10	0	0	0	0	79	0	A	A	A	A	0	B	0	C	0	0	B	2	10	5	C	0	A	B	C	0	D	A	C	0	0	B	2	10	4	C	B	A	A	C	B	A	A	D	B	0	C
31	13	10	0	0	1	0	80	0	0	0	0	A	0	A	0	0	0	0	A	0	12	9	0	C	D	B	C	B	D	0	D	B	0	B	1	11	3	0	C	D	B	0	B	D	0	C	C	0	C
42	25	10	0	0	0	0	81	0	C	A	0	A	B	D	0	0	0	0	B	0	12	6	C	C	A	D	C	0	D	0	0	0	0	C	2	10	5	C	C	A	B	0	D	D	0	0	0	A	C
51	30	15	0	0	0	0	82	C	B	A	C	A	C	D	0	0	0	0	0	1	11	5	C	C	A	D	A	D	D	0	C	0	A	C	2	10	2	A	A	A	D	A	D	D	0	C	0	A	C
43	25	15	0	0	0	0	83	C	B	A	0	A	0	D	B	C	B	C	C	2	10	2	D	C	A	0	D	C	A	A	C	D	A	C	2	10	1	D	C	A	C	D	D	D	A	C	0	A	C
28	8	5	0	0	0	0	84	C	C	D	C	A	B	A	B	B	B	C	B	3	9	0	C	C	D	C	A	B	D	D	B	B	C	B	3	9	0	C	C	D	B	A	B	D	C	A	B	A	C
30	15	8	0	0	0	0	85	C	0	A	0	C	0	D	0	0	0	B	C	2	10	6	C	C	A	B	C	0	D	C	0	0	0	C	2	10	4	C	C	A	B	C	B	D	0	C	B	A	C
36	18	10	0	0	0	0	86	0	0	A	D	0	0	D	0	0	0	0	0	0	12	9	C	C	A	D	D	0	D	B	0	0	0	C	1	11	4	C	C	A	D	C	B	D	A	C	B	A	C
46	33	10	0	0	0	1	87	C	D	A	D	A	B	D	B	B	D	A	C	2	10	0	A	C	A	A	C	B	D	C	C	B	A	C	2	10	0	B	C	A	A	A	B	D	B	C	B	A	C
54	30	0	0	0	0	0	88	C	C	C	0	0	0	D	C	0	0	0	0	1	11	7	B	B	A	B	A	C	D	A	A	A	B	C	4	8	0	A	B	C	B	C	B	D	B	C	B	A	C
49	0	0	0	0	0	0	89	C	B	A	0	C	B	B	0	A	B	A	C	3	9	2	C	C	A	B	A	C	D	0	D	B	0	C	1	11	2	D	C	A	0	0	B	D	A	D	B	A	C
36	15	0	1	0	1	0	90	C	0	A	0	C	0	0	0	0	0	A	C	2	10	7	C	0	A	0	C	0	B	0	D	0	0	C	3	9	6	C	C	A	0	A	B	D	C	D	B	A	C
39	24	10	0	0	0	0	91	C	C	D	B	A	B	A	B	A	B	A	C	1	11	0	C	C	D	B	A	B	D	B	D	B	A	B	0	12	0	C	C	D	B	A	B	D	C	D	B	A	C
35	20	9	0	0	0	0	92	C	C	D	A	B	C	D	0	0	0	B	C	1	11	3	B	D	C	C	D	D	D	0	D	D	D	D	4	8	1	A	D	D	D	D	A	D	0	0	C	A	C
32	17	10	0	0	1	0	93	0	C	A	0	0	0	A	0	0	0	0	C	1	11	8	0	C	A	0	0	C	D	0	0	0	0	C	1	11	7	C	C	A	0	0	B	D	0	0	C	A	C
50	20	8	0	0	0	0	94	C	C	A	B	A	D	D	A	C	C	A	C	2	10	0	C	B	A	B	A	D	A	B	C	0	0	C	2	10	2	0	C	A	0	A	D	D	0	C	C	A	C
47	30	10	0	0	0	0	95	0	C	A	0	A	0	D	0	C	0	A	C	1	11	5	0	B	A	0	A	0	0	0	B	B	B	C	2	10	5	A	D	A	B	D	C	C	B	C	C	A	C
32	20	5	0	0	0	0	96	0	0	D	B	A	D	D	B	D	C	0	C	2	10	3	0	B	A	B	0	0	D	0	D	0	C	C	2	10	5	C	B	A	D	A	B	A	0	D	C	A	C
30	10	10	0	0	0	0	97	C	B	A	B	A	D	A	B	D	C	A	C	2	10	0	C	C	A	B	A	D	A	B	D	C	A	C	2	10	0	C	C	A	B	A	D	A	B	D	C	A	C
48	30	10	0	0	0	0	98	C	B	A	A	C	D	D	B	D	B	A	C	3	9	0	C	B	A	C	C	D	D	A	D	B	A	C	5	7	0	C	C	A	A	A	D	D	C	D	C	A	C
51	35	20	1	0	1	1	99	B	B	A	D	A	D	A	C	A	A	A	B	3	9	0	A	B	D	B	A	B	B	C	A	A	C	B	3	9	0	B	B	A	A	A	B	D	A	C	D	A	C
51	33	8	0	0	0	0	100	0	C	D	B	C	0	D	0	C	0	0	C	2	10	5	C	B	A	B	A	C	D	B	B	B	D	C	2	10	0	C	C	A	B	A	A	D	B	C	B	B	C
29	15	10	1	0	1	0	101	C	C	0	0	0	B	D	0	D	C	B	C	1	11	4	C	C	A	D	D	B	A	0	C	B	B	C	1	11	1	C	C	A	B	A	B	D	A	D	B	B	C
50	22	10	0	0	1	0	102	0	A	B	D	B	B	0	C	C	D	0	D	1	11	3	0	A	A	C	B	C	0	0	D	0	C	B	3	9	4	0	B	B	B	A	A	B	C	D	B	B	C
31	15	10	0	0	1	1	103	C	B	A	B	A	B	D	A	C	0	0	0	0	12	3	D	C	A	D	C	0	D	A	A	0	B	C	3	9	2	C	C	A	D	C	B	D	0	C	0	C	C
29	15	5	0	0	0	0	104	0	D	C	A	A	D	B	A	C	D	0	B	4	8	2	C	C	A	B	C	D	D	A	A	C	A	C	4	8	0	C	C	A	A	C	D	D	B	C	B	C	C
25	0	0	0	0	0	0	105	C	B	A	B	C	D	D	A	C	C	A	C	3	9	0	C	C	A	D	D	D	D	C	D	B	A	C	2	10	0	C	C	A	A	A	D	D	A	D	D	C	C
33	10	4	0	0	1	1	106	C	C	A	A	A	C	D	D	A	C	0	B	0	12	1	B	C	A	C	A	D	D	0	D	B	D	B	3	9	1	C	C	A	C	A	B	D	B	B	D	D	C
35	0	0	0	0	0	0	107	C	0	A	B	A	0	C	A	0	B	0	D	0	12	4	C	C	0	0	A	D	A	D	0	0	A	0	1	11	5	A	0	C	D	C	D	C	A	0	0	A	D
46	25	10	0	0	1	0	108	C	A	0	0	A	A	0	C	D	A	0	D	2	10	4	C	C	0	0	A	D	A	D	0	0	A	0	1	11	5	A	0	C	D	C	D	C	A	0	0	A	D
28	10	5	0	0	0	0	109																				A												A					D	B
58	41	15	0	0	0	0	110	C				C											C															C					B
																				1.09615	10.9038	3.32692													1.57955	10.4712	2.57692
56	0	0	0	0	0	0	111
52	30	3	0	0	0	0	112
57	15	0	0	0	0	0	113
59	29	10	0	0	0	0	114			D																																		D					B
28	0	0	0	0	0	0	115							A											A	B			A											A			B	A				A	C
[truncated: 3 more columns]
